# Supplementary material for: Protective Efficacy of Passive Immunization with Monoclonal Antibodies in Animal Models of H5N1 Highly Pathogenic Avian Influenza Virus Infection
Source: PubMed Central journal article supplement (PMC4055766; doi:10.1371/journal.ppat.1004192), 2014-06-12

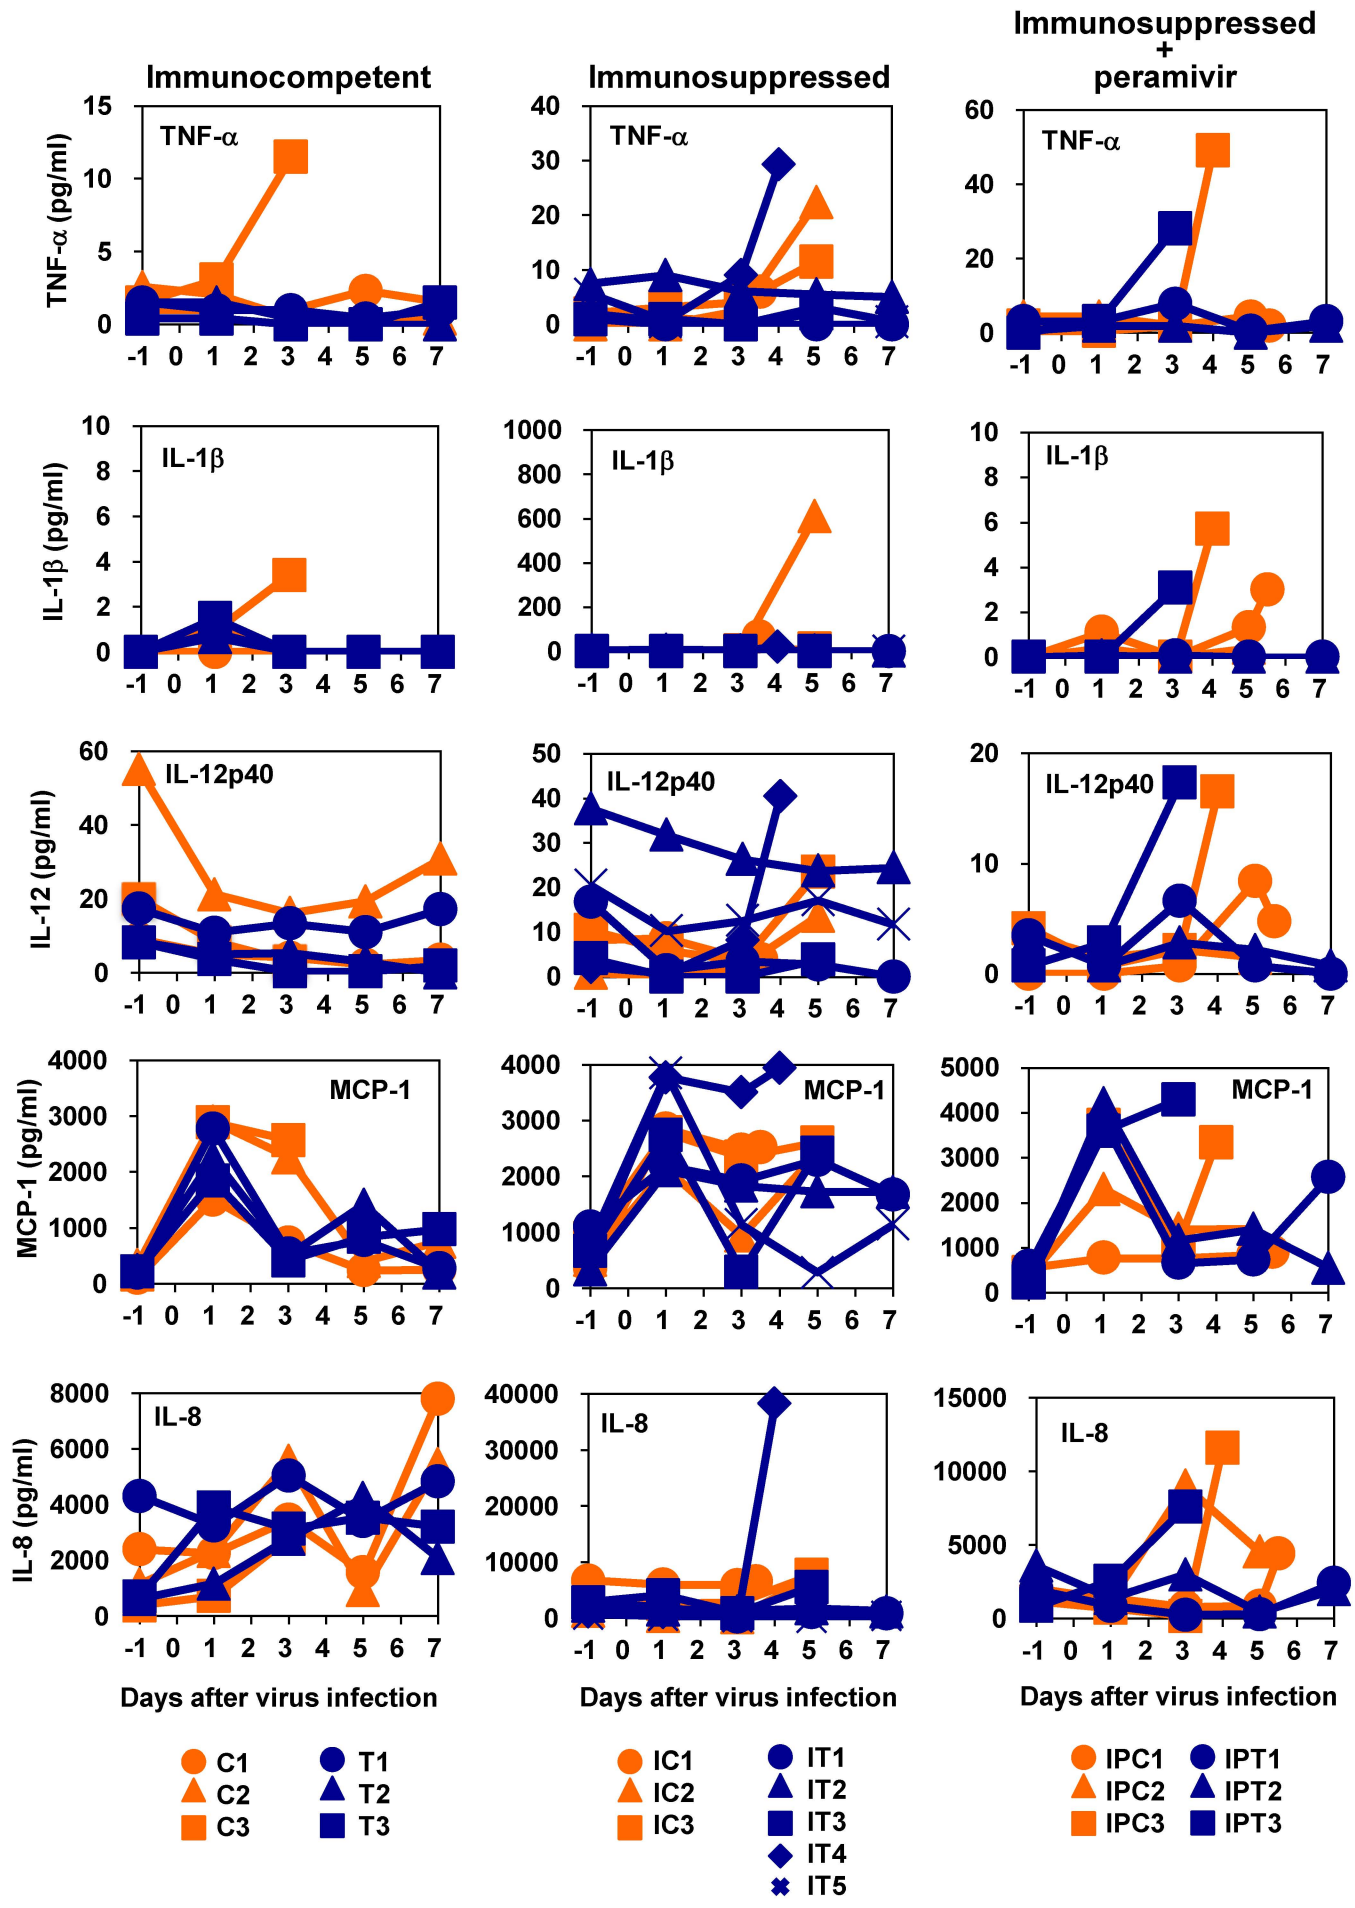

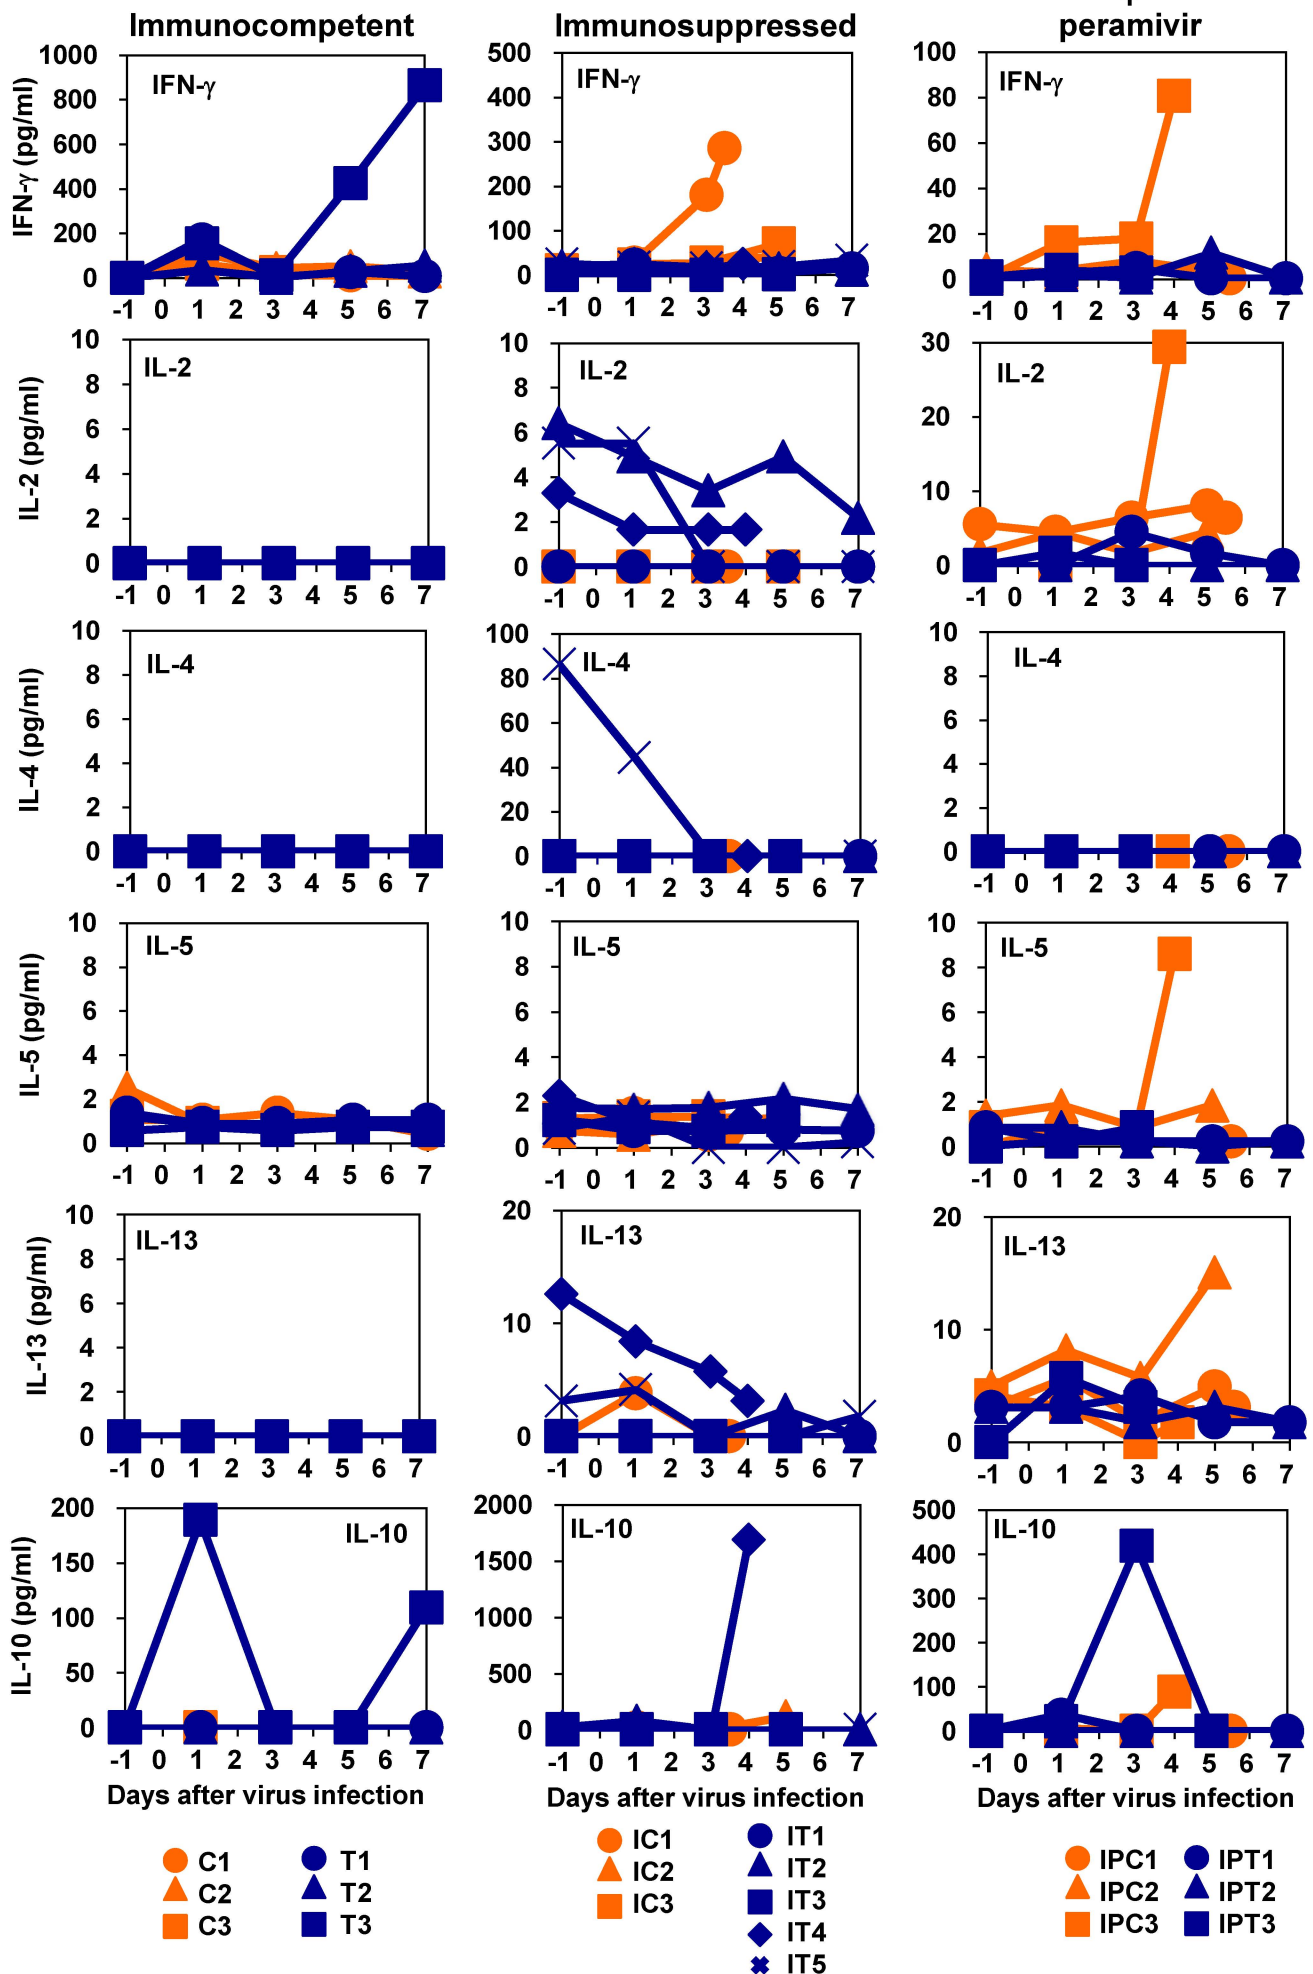

Supplement: ppat.1004192.s005.pdf [file ppat.1004192.s005.pdf]
